# Supplementary material for: Vessel inflammation and morphological changes in patients with large vessel vasculitis: a retrospective study
Source: HighWire-hosted journal article supplement (doi:10.1136/rmdopen-2021-001977), 2022-01-01
Supplement: rmdopen-2021-001977supp001_data_supplement.pdf [file rmdopen-2021-001977supp001_data_supplement.pdf]

**Vessel inflammation and morphological changes in patients with large vessel vasculitis: a retrospective study**

Giulia Besutti<sup>1</sup>, Francesco Muratore<sup>2</sup>, Pamela Mancuso<sup>3</sup>, Marco Ferrari<sup>1</sup>, Elena Galli<sup>2</sup>, Lucia Spaggiari<sup>1</sup>, Filippo Monelli<sup>1,4</sup>, Massimiliano Casali<sup>5</sup>, Annibale Versari<sup>5</sup>, Luigi Boiardi<sup>2</sup>, Chiara Marvisi<sup>6</sup>, Guido Ligabue<sup>7</sup>, Pierpaolo Pattacini<sup>1</sup>, Paolo Giorgi Rossi<sup>3</sup>, Carlo Salvarani<sup>2</sup>

1. Radiology Unit, Azienda USL – IRCCS di Reggio Emilia, Reggio Emilia, Italy.
2. Rheumatology Unit, Azienda USL – IRCCS di Reggio Emilia, Reggio Emilia, Italy.
3. Epidemiology Unit, Azienda USL – IRCCS di Reggio Emilia, Reggio Emilia, Italy.
4. Clinical and Experimental Medicine PhD program, University of Modena and Reggio Emilia, Modena, Italy.
5. Nuclear Medicine Unit, Azienda USL – IRCCS di Reggio Emilia, Reggio Emilia, Italy.
6. Rheumatology Unit, Università degli Studi di Modena e Reggio Emilia, Modena, Italy.
7. Radiology Unit. University of Modena and Reggio Emilia, Modena, Italy.

## Supplementary Materials

Supplementary Table 1: Clinical characteristics in patients subdivided according to PET score.

|                                                                                                                    | Patients with<br>PET Score=0 in<br>all segments<br>(n=45) | Patients with at<br>least one segment<br>with PET Score=1<br>(n=16) | Patients with<br>at least one<br>segment with<br>PET Score=2<br>(n=17) | Patients with<br>at least one<br>segment with<br>PET Score=3<br>n=22 |
|--------------------------------------------------------------------------------------------------------------------|-----------------------------------------------------------|---------------------------------------------------------------------|------------------------------------------------------------------------|----------------------------------------------------------------------|
| Age at diagnosis, median (IQR)                                                                                     | 47 (27 - 62)                                              | 51.5 (34.5 - 60)                                                    | 51 (31 - 68)                                                           | 43 (25 - 60)                                                         |
| Sex, n (%)                                                                                                         |                                                           |                                                                     |                                                                        |                                                                      |
| Male                                                                                                               | 12 (26.7%)                                                | 2 (12.5%)                                                           | 4 (23.5%)                                                              | 4 (18.2%)                                                            |
| Female                                                                                                             | 33 (73.3%)                                                | 14 (87.5%)                                                          | 13 (76.5%)                                                             | 18 (81.8%)                                                           |
| Type of large vessel vasculitis                                                                                    |                                                           |                                                                     |                                                                        |                                                                      |
| TAK                                                                                                                | 24 (53.3%)                                                | 9 (56.3%)                                                           | 8 (47.1%)                                                              | 12 (54.5%)                                                           |
| LV-GCA                                                                                                             | 21 (46.7%)                                                | 7 (43.8%)                                                           | 9 (52.9%)                                                              | 10 (45.5%)                                                           |
| Newly diagnosed (%)                                                                                                | 6 (13.3%)                                                 | 4 (25%)                                                             | 3 (17.6%)                                                              | 12 (54.5%)                                                           |
| Disease activity, n (%)                                                                                            |                                                           |                                                                     |                                                                        |                                                                      |
| Inactive                                                                                                           | 34 (75.6%)                                                | 9 (56.3%)                                                           | 11 (64.7%)                                                             | 3 (13.6%)                                                            |
| Active                                                                                                             | 11 (24.4%)                                                | 7 (43.8%)                                                           | 6 (35.3%)                                                              | 19 (86.4%)                                                           |
| ESR (mm/h), median (IQR),<br>missing=1                                                                             | 18 (11.5 - 33.5)                                          | 25 (9 - 43.5)                                                       | 22 (10 - 33)                                                           | 70 (54 - 85)                                                         |
| CRP (mg/dl), median (IQR),<br>missing=2                                                                            | 0.6 (0.2 - 1.8)                                           | 0.9 (0.2 - 3.8)                                                     | 0.5 (0.3 - 1.7)                                                        | 3.9 (1.4 - 10.7)                                                     |
| Vascular symptoms, n (%),<br>missing=1                                                                             | 6 (13.3%)                                                 | 6 (37.5%)                                                           | 1 (5.9%)                                                               | 10 (45.5%)                                                           |
| Systemic symptoms, n (%),<br>missing=1                                                                             | 5 (11.1%)                                                 | 3 (18.8%)                                                           | 3 (17.6%)                                                              | 11 (50%)                                                             |
| Cranial symptoms, n (%), missing=1                                                                                 | 1 (2.2%)                                                  | 2 (12.5%)                                                           | 1 (5.9%)                                                               | 3 (13.6%)                                                            |
| Visual manifestations, n (%),<br>missing=1                                                                         | 0 (0%)                                                    | 2 (12.5%)                                                           | 0 (0%)                                                                 | 0 (0%)                                                               |
| Polymyalgia rheumatica, n (%),<br>missing=1                                                                        | 4 (8.9%)                                                  | 1 (6.3%)                                                            | 0 (0%)                                                                 | 2 (9.1%)                                                             |
| Patients with at least one<br>synchronous stenosis or dilation, n<br>(%)                                           | 24 (53.3%)                                                | 8 (50%)                                                             | 10 (58.8%)                                                             | 15 (68.2%)                                                           |
| Patients with at least one follow-up<br>CTA / MRA performed between 6<br>and 30 months from baseline PET, n<br>(%) | 12 (26.7%)                                                | 2 (12.5%)                                                           | 5 (29.4%)                                                              | 9 (40.9%)                                                            |
| Patients with at least one incident<br>stenosis or dilation, n(%)                                                  | 0 (0%)                                                    | 0 (0%)                                                              | 0 (0%)                                                                 | 4 (44.4%)                                                            |

**Supplementary Table 1:** Baseline clinical characteristics and study outcomes in patients subdivided by PET score (patients with all segments with PET score=0, patients with at least one segment with PET score=1 and no segments with PET score  $\geq 2$ , patients with at least one segment with PET score=2 and no segments with PET score  $\geq 3$ , patients with at least one segment with PET score=3. TAK, Takayasu arteritis; LV-GCA, large vessel-giant cell arteritis; IQR, Interquartile range; ESR, Erythrocyte sedimentation rate; CRP, C-reactive protein; WBC, white blood cell; CTA, Computed Tomography Angiography; MRA, Magnetic Resonance Angiography, PET, Positron Emission Tomography.

Supplementary Table 2: Anatomical distribution of imaging findings.

| Segments                    | Thickening        |                   | Stenosis           |                 | Dilation         |               | 0                 | PET Score         |                 |                 | Total       |
|-----------------------------|-------------------|-------------------|--------------------|-----------------|------------------|---------------|-------------------|-------------------|-----------------|-----------------|-------------|
|                             | No                | Yes               | No                 | Yes             | No               | Yes           |                   | 1                 | 2               | 3               |             |
| Ascending aorta             | 69 (78.4)         | 19 (21.6)         | 88 (100)           | 0 (0)           | 76 (86.4)        | 12 (13.6)     | 39 (44.3)         | 26 (29.5)         | 13 (14.8)       | 10 (11.4)       | 88          |
| Aortic arch                 | 52 (59.1)         | 36 (40.9)         | 88 (100)           | 0 (0)           | 86 (97.7)        | 2 (2.3)       | 39 (44.3)         | 24 (27.3)         | 12 (13.6)       | 13 (14.8)       | 88          |
| Innominate artery           | 75 (85.2)         | 13 (14.8)         | 69 (78.4)          | 19 (21.6)       | 83 (94.3)        | 5 (5.7)       | 39 (44.3)         | 36 (40.9)         | 6 (6.8)         | 7 (8)           | 88          |
| Right common carotid artery | 63 (71.6)         | 25 (28.4)         | 79 (89.8)          | 9 (10.2)        | 87 (98.9)        | 1 (1.1)       | 39 (44.3)         | 43 (48.9)         | 3 (3.4)         | 3 (3.4)         | 88          |
| Left common carotid artery  | 57 (64.8)         | 31 (35.2)         | 75 (85.2)          | 13 (14.8)       | 85 (96.6)        | 3 (3.4)       | 39 (44.3)         | 39 (44.3)         | 3 (3.4)         | 7 (8)           | 88          |
| Right subclavian artery     | 56 (63.6)         | 32 (36.4)         | 86 (97.7)          | 2 (2.3)         | 86 (97.7)        | 2 (2.3)       | 39 (44.3)         | 39 (44.3)         | 3 (3.4)         | 7 (8)           | 88          |
| Left subclavian artery      | 57 (66.3)         | 29 (33.7)         | 65 (75.6)          | 21 (24.4)       | 84 (97.7)        | 2 (2.3)       | 38 (44.2)         | 39 (45.3)         | 2 (2.3)         | 7 (8.1)         | 86          |
| Abdominal aorta             | 59 (81.9)         | 13 (18.1)         | 69 (95.8)          | 3 (4.2)         | 71 (98.6)        | 1 (1.4)       | 31 (43.1)         | 34 (47.2)         | 2 (2.8)         | 5 (6.9)         | 72          |
| Celiac artery               | 71 (98.6)         | 1 (1.4)           | 62 (86.1)          | 10 (13.9)       | 71 (98.6)        | 1 (1.4)       | 31 (43.1)         | 40 (55.6)         | 0 (0)           | 1 (1.4)         | 72          |
| Superior mesenteric artery  | 70 (97.2)         | 2 (2.8)           | 64 (88.9)          | 8 (11.1)        | 72 (100)         | 0 (0)         | 45 (62.5)         | 25 (34.7)         | 0 (0)           | 2 (2.8)         | 72          |
| Right renal artery          | 72 (100)          | 0 (0)             | 70 (97.2)          | 2 (2.8)         | 72 (100)         | 0 (0)         | 45 (62.5)         | 26 (36.1)         | 0 (0)           | 1 (1.4)         | 72          |
| Left renal artery           | 70 (97.2)         | 2 (2.8)           | 71 (98.6)          | 1 (1.4)         | 72 (100)         | 0 (0)         | 45 (62.5)         | 26 (36.1)         | 0 (0)           | 1 (1.4)         | 72          |
| Right iliac artery          | 69 (95.8)         | 3 (4.2)           | 72 (100)           | 0 (0)           | 72 (100)         | 0 (0)         | 45 (62.5)         | 26 (36.1)         | 0 (0)           | 1 (1.4)         | 72          |
| Left iliac artery           | 69 (95.8)         | 3 (4.2)           | 72 (100)           | 0 (0)           | 71 (98.6)        | 1 (1.4)       | 45 (62.5)         | 26 (36.1)         | 0 (0)           | 1 (1.4)         | 72          |
| <b>Total</b>                | <b>971 (80.5)</b> | <b>235 (19.5)</b> | <b>1114 (92.4)</b> | <b>92 (7.6)</b> | <b>1170 (97)</b> | <b>36 (3)</b> | <b>598 (49.6)</b> | <b>479 (39.7)</b> | <b>55 (4.6)</b> | <b>74 (6.1)</b> | <b>1206</b> |

**Supplementary Table 3. Association of PET score and wall thickening**

| PET Score    | Thickening |            |             | % row       |             |              | % column     |              |              |
|--------------|------------|------------|-------------|-------------|-------------|--------------|--------------|--------------|--------------|
|              | No         | Yes        | Total       | No          | Yes         | Total        | No           | Yes          | Total        |
| <b>0</b>     | 504        | 94         | 598         | 84.3        | 15.7        | 100.0        | 51.9         | 40.0         | 49.6         |
| <b>1</b>     | 393        | 86         | 479         | 82.0        | 18.0        | 100.0        | 40.5         | 36.6         | 39.7         |
| <b>2</b>     | 40         | 15         | 55          | 72.7        | 27.3        | 100.0        | 4.1          | 6.4          | 4.6          |
| <b>3</b>     | 34         | 40         | 74          | 45.9        | 54.1        | 100.0        | 3.5          | 17.0         | 6.1          |
| <b>Total</b> | <b>971</b> | <b>235</b> | <b>1206</b> | <b>80.5</b> | <b>19.5</b> | <b>100.0</b> | <b>100.0</b> | <b>100.0</b> | <b>100.0</b> |

Supplementary Table 3: Association between PET score and wall thickening at morphological imaging performed within 3 months from PET-CT scan.

**Supplementary Table 4. Per-segment analysis for synchronous stenoses/dilations.**

|                                      | True<br>Positives | True<br>Negatives | False<br>Positives | False<br>Negatives |
|--------------------------------------|-------------------|-------------------|--------------------|--------------------|
| <b>PET Score <math>\geq 1</math></b> | 73                | 548               | 535                | 50                 |
| <b>PET Score <math>\geq 2</math></b> | 22                | 976               | 107                | 101                |
| <b>PET Score <math>\geq 3</math></b> | 11                | 1020              | 63                 | 112                |
| <b>Wall thickening</b>               | 2                 | 227               | 72                 | 5                  |

Supplementary Table 4: Per-segment analyses reporting true positive, true negative, false positive, and false negative for segments with a PET score  $\geq 1$ , or  $\geq 2$ , or  $\geq 3$ , or with wall thickening, for the presence of synchronous stenoses or dilations in the same vascular segment.

**Supplementary Table 5. Per-patient analysis.**

|                                      | Presence of at least one synchronous stenosis or dilation |           |           |           | Accuracy for stenosis OR dilations |                         |                        |                        |
|--------------------------------------|-----------------------------------------------------------|-----------|-----------|-----------|------------------------------------|-------------------------|------------------------|------------------------|
|                                      | True                                                      | True      | False     | False     | Sensitivity<br>(95% CI)            | Specificity<br>(95% CI) | PPV<br>(95% CI)        | NPV<br>(95% CI)        |
|                                      | Positives                                                 | Negatives | Positives | Negatives |                                    |                         |                        |                        |
| <b>PET Score <math>\geq 1</math></b> | 33                                                        | 21        | 22        | 24        | 57.9%<br>(44.1%-70.9%)             | 48.8%<br>(33.3%-64.5%)  | 60.0%<br>(45.9%-73.0%) | 46.7%<br>(31.7%-62.1%) |
| <b>PET Score <math>\geq 2</math></b> | 25                                                        | 29        | 14        | 32        | 43.9%<br>(30.7%-57.6%)             | 67.4%<br>(51.5%-80.9%)  | 64.1%<br>(47.2%-78.8%) | 47.5%<br>(34.6%-60.7%) |
| <b>PET Score <math>\geq 3</math></b> | 15                                                        | 36        | 7         | 42        | 26.3%<br>(15.5%-39.7%)             | 83.7%<br>(69.3%-93.2%)  | 68.2%<br>(45.1%-86.1%) | 46.2%<br>(34.8%-57.8%) |
| <b>Wall thickening</b>               | 38                                                        | 26        | 17        | 19        | 66.7%<br>(52.9%-78.6%)             | 60.5%<br>(44.4%-75.0%)  | 69.1%<br>(55.2%-80.9%) | 57.8%<br>(42.2%-72.3%) |

Supplementary Table 5: Per-patient analyses reporting sensitivity, specificity, positive predictive value (PPV), and negative predictive value (NPV) of having at least one vascular segment with a PET score  $\geq 1$ , or  $\geq 2$ , or  $\geq 3$ , or with wall thickening, for the presence of synchronous stenoses or dilations in at least one vascular segment. PPV, positive predictive value; NPV, negative predictive value.

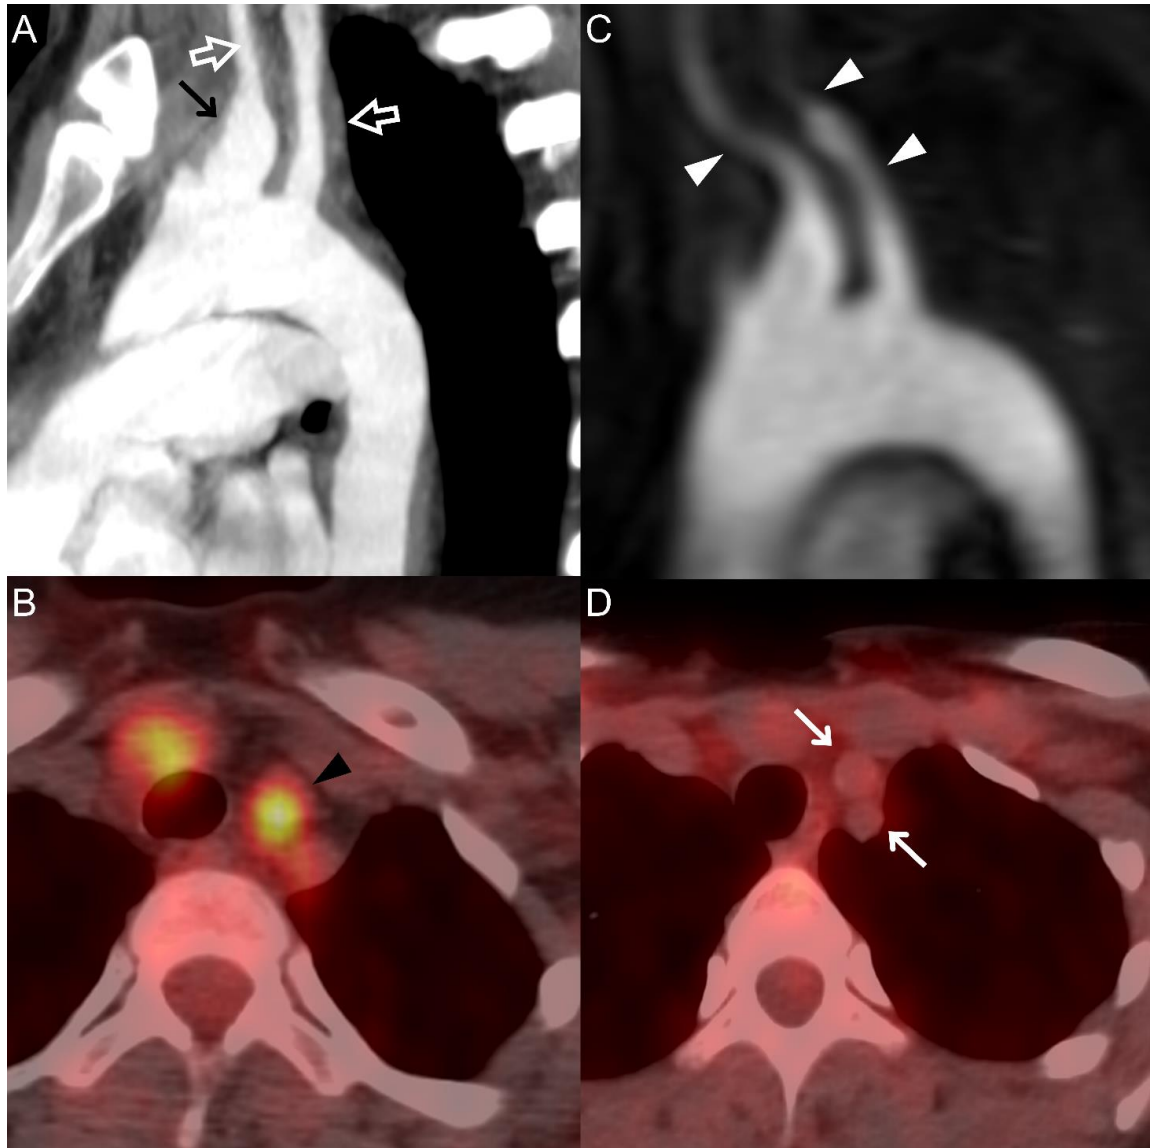

Supplementary Figure 1: Baseline CT angiography and PET-CT scan of a 32-year-old female patient with Takayasu arteritis, showing wall thickening of left carotid and subclavian arteries (empty arrows) (A), 18F-FDG uptake with PET score =3 of the left carotid artery (black arrowhead) (B), and dilation of the left carotid artery proximally to the wall thickening (black arrow) (A). After 20 months, 18F-FDG uptake and wall thickening were resolved (black arrows), but a stenosis of both arteries, mainly visible in the left subclavian artery, has appeared (white arrowheads) (C, D).
